# Supplementary material for: Systems Biology Approach Identifies Prognostic Signatures of Poor Overall Survival and Guides the Prioritization of Novel BET-CHK1 Combination Therapy for Osteosarcoma
Source: MDPI journal article supplement (doi:10.3390/cancers12092426), 2020-08-26
Supplement: s1 [file s1]

# Fig. S2

## Whole blot with bands and all molecular weights

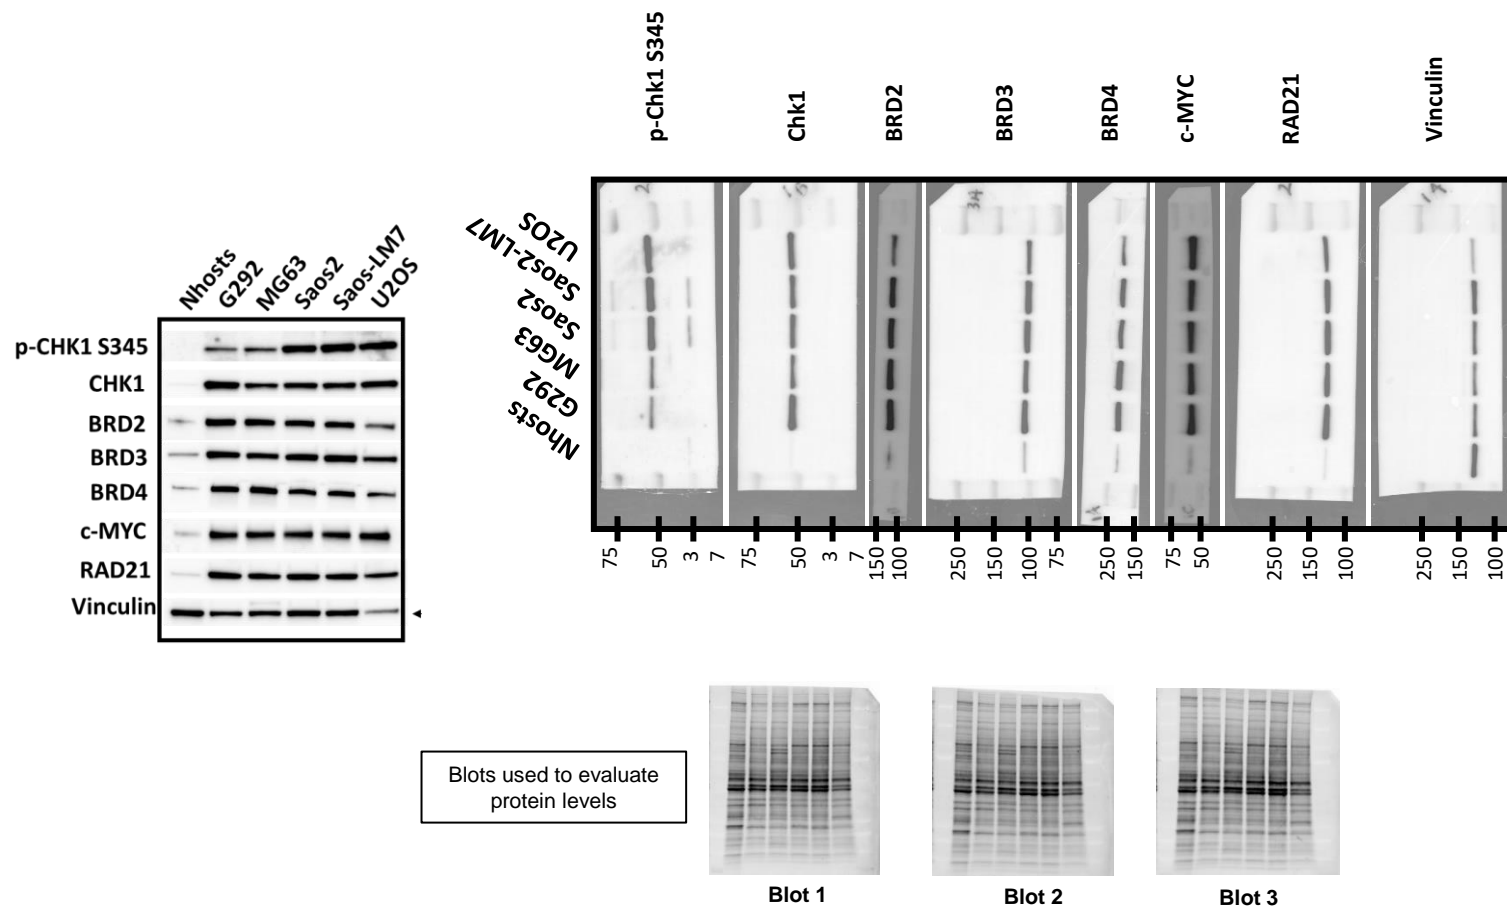

**Figure S2:** Validation of targets of interest in established OS cell lines. *Whole blot with bands and all molecular weights*

# Fig. S3

## Whole blot with bands and all molecular weights

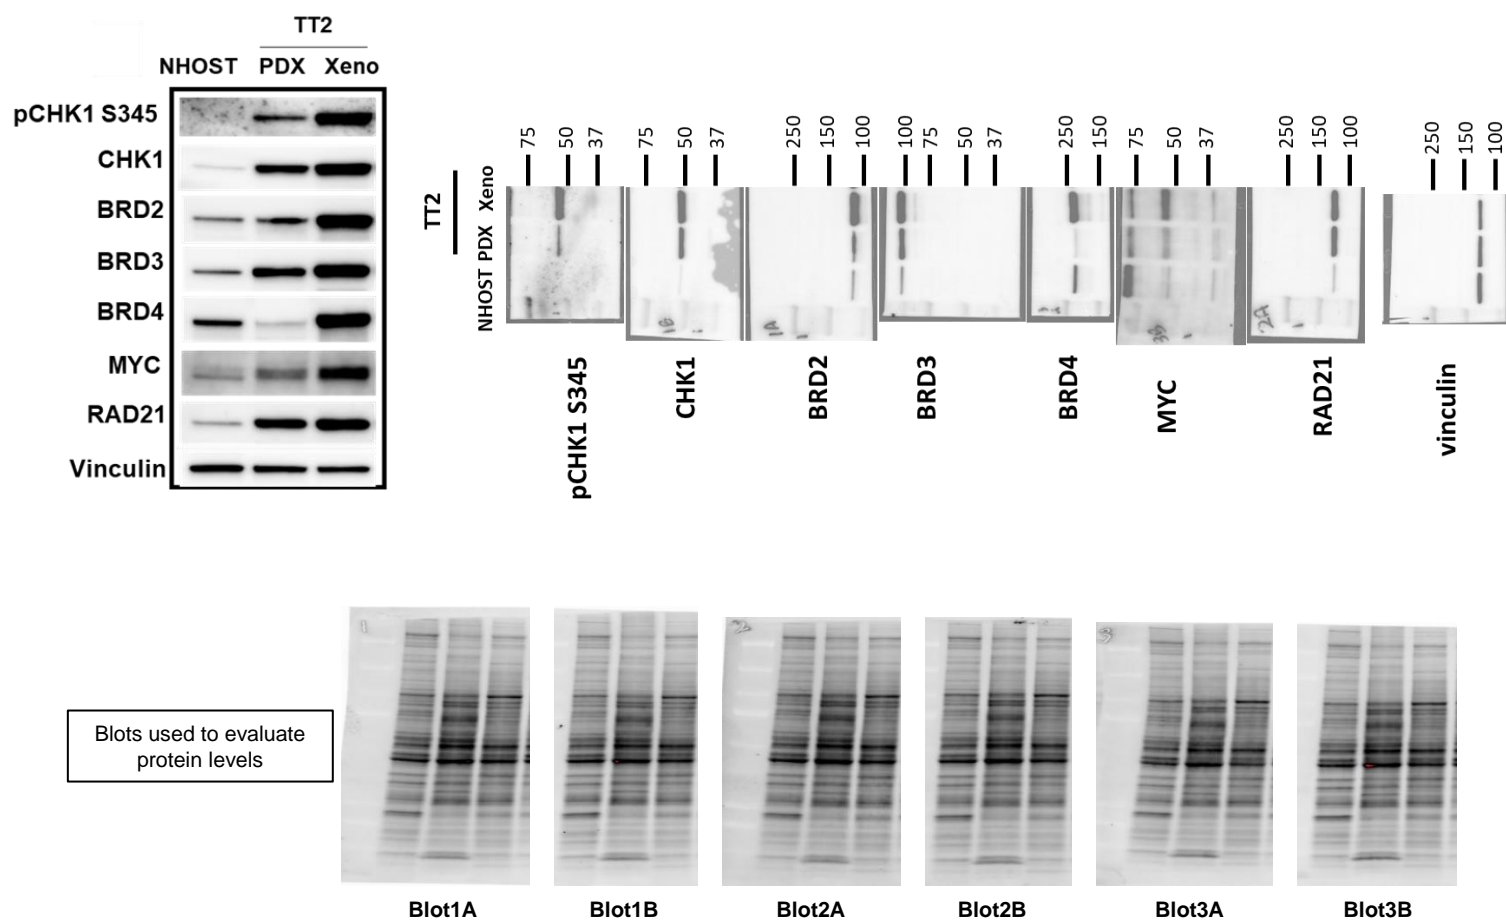

**Figure S3:** Validation of targets in TT2-77 PDX and PDX-derived OS. *Whole blot with bands and all molecular weights*

# Fig. S4

## Whole blot with bands and all molecular weights

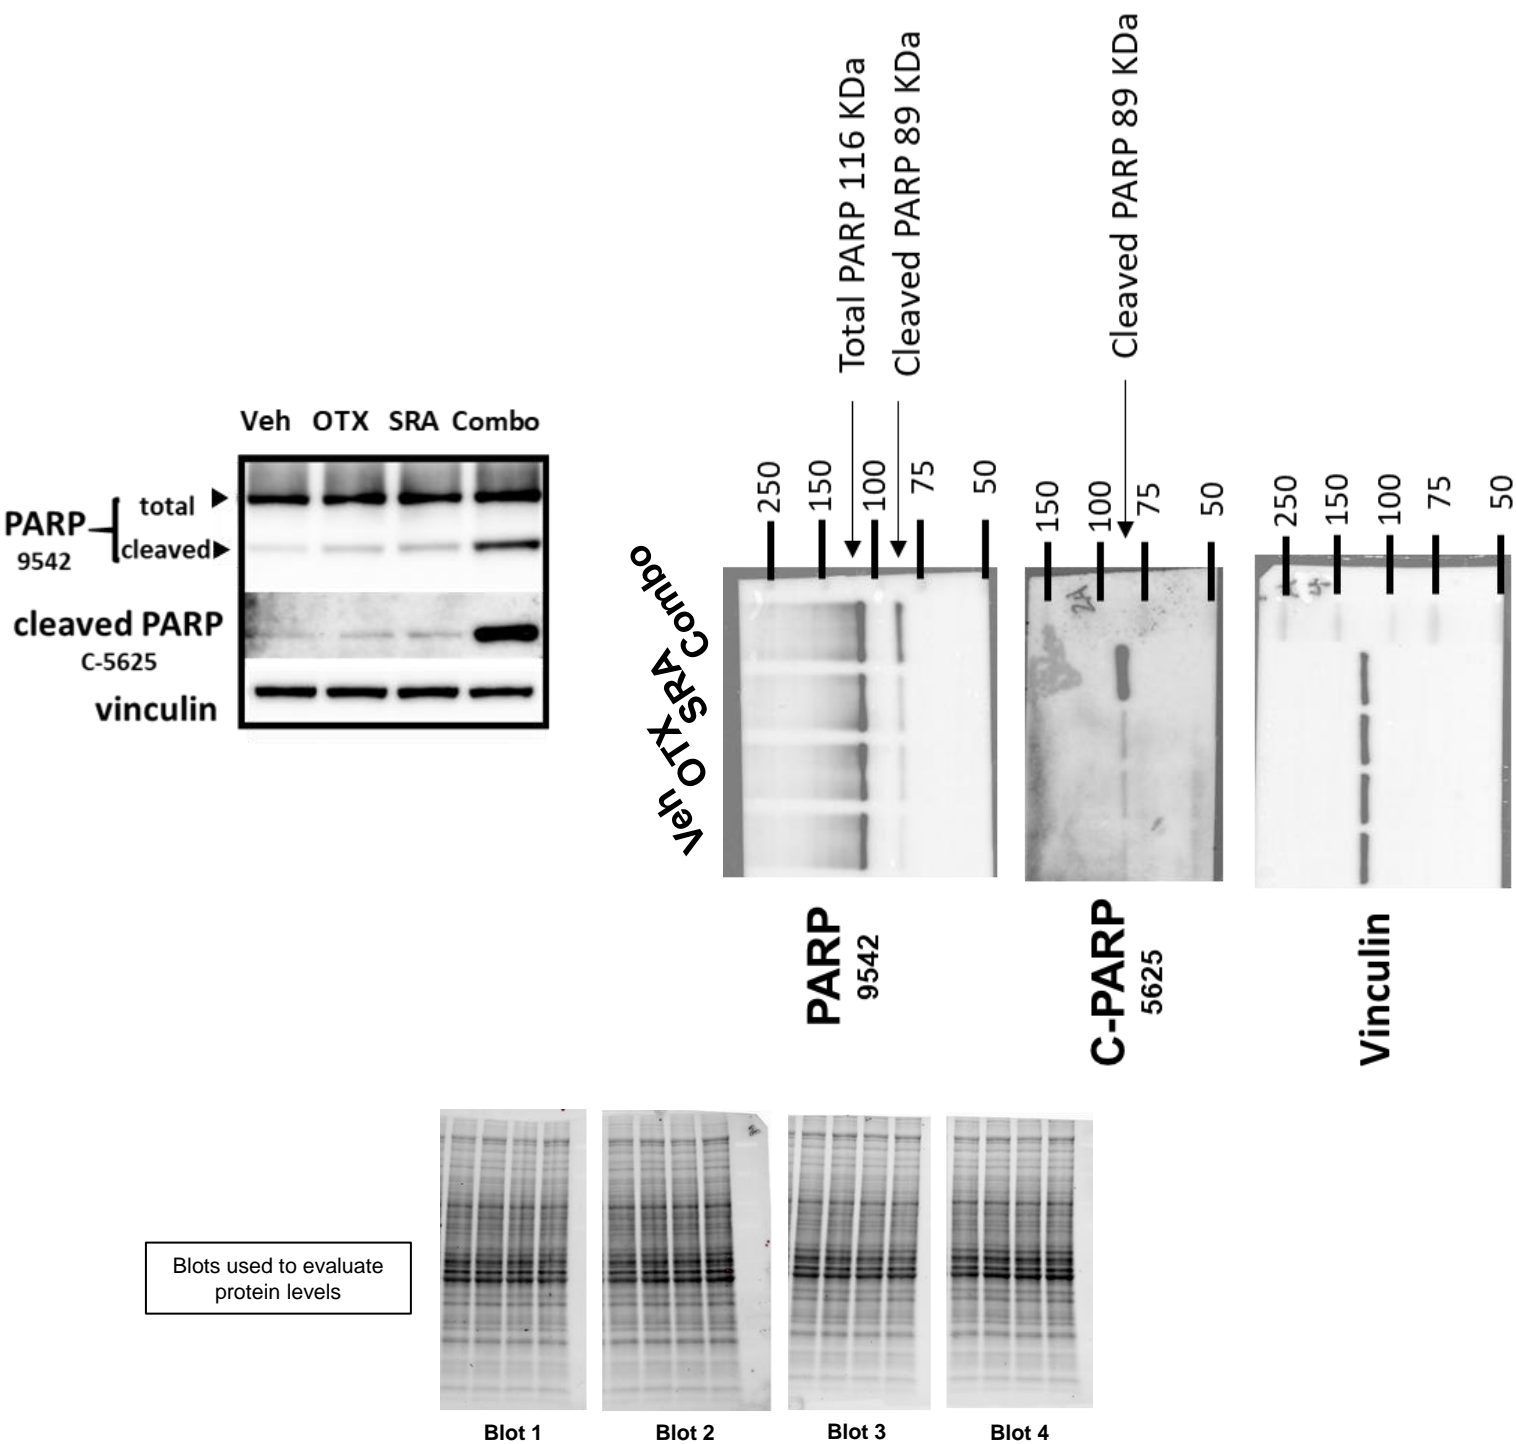

**Figure S4:** Quantification of cleaved -PARP protein expression in Saos2 cells treated with single agent or combination BETi + CHK1i. Proteins of interest were quantified from Fig. 5b . Veh = vehicle; OTX= BETi/OTX-015; SRA= CHK1i/SRA737; Combo = OTX (0.31μM) + CHK1i/SRA737 (3.75μM). *Whole blot with bands and all molecular weights*

# Figs. S6

## Whole blot with bands and all molecular weights

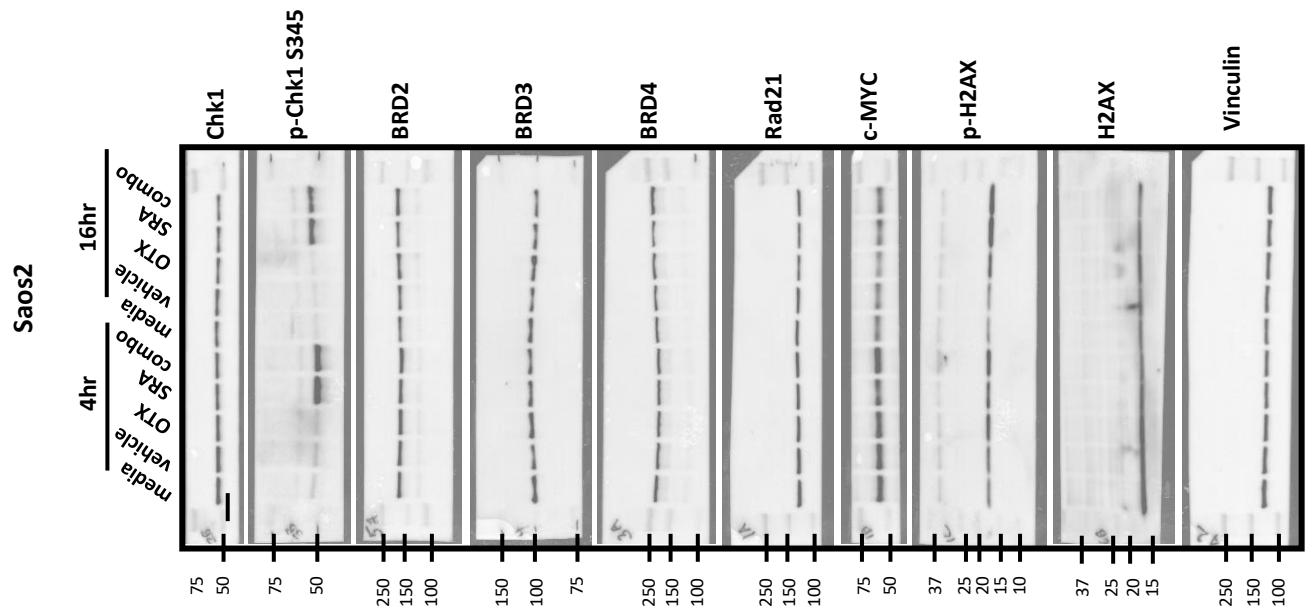

Blots used to evaluate protein levels

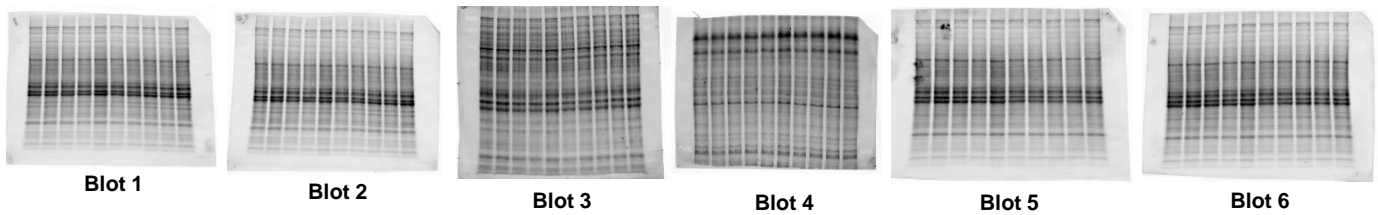

**Figure S6:** Quantification of protein expression in Saos2 cells treated with single agent or combination BETi+CHK1i.  
*Whole blot with bands and all molecular weights*

# Fig. S7

## Whole blot with bands and all molecular weights

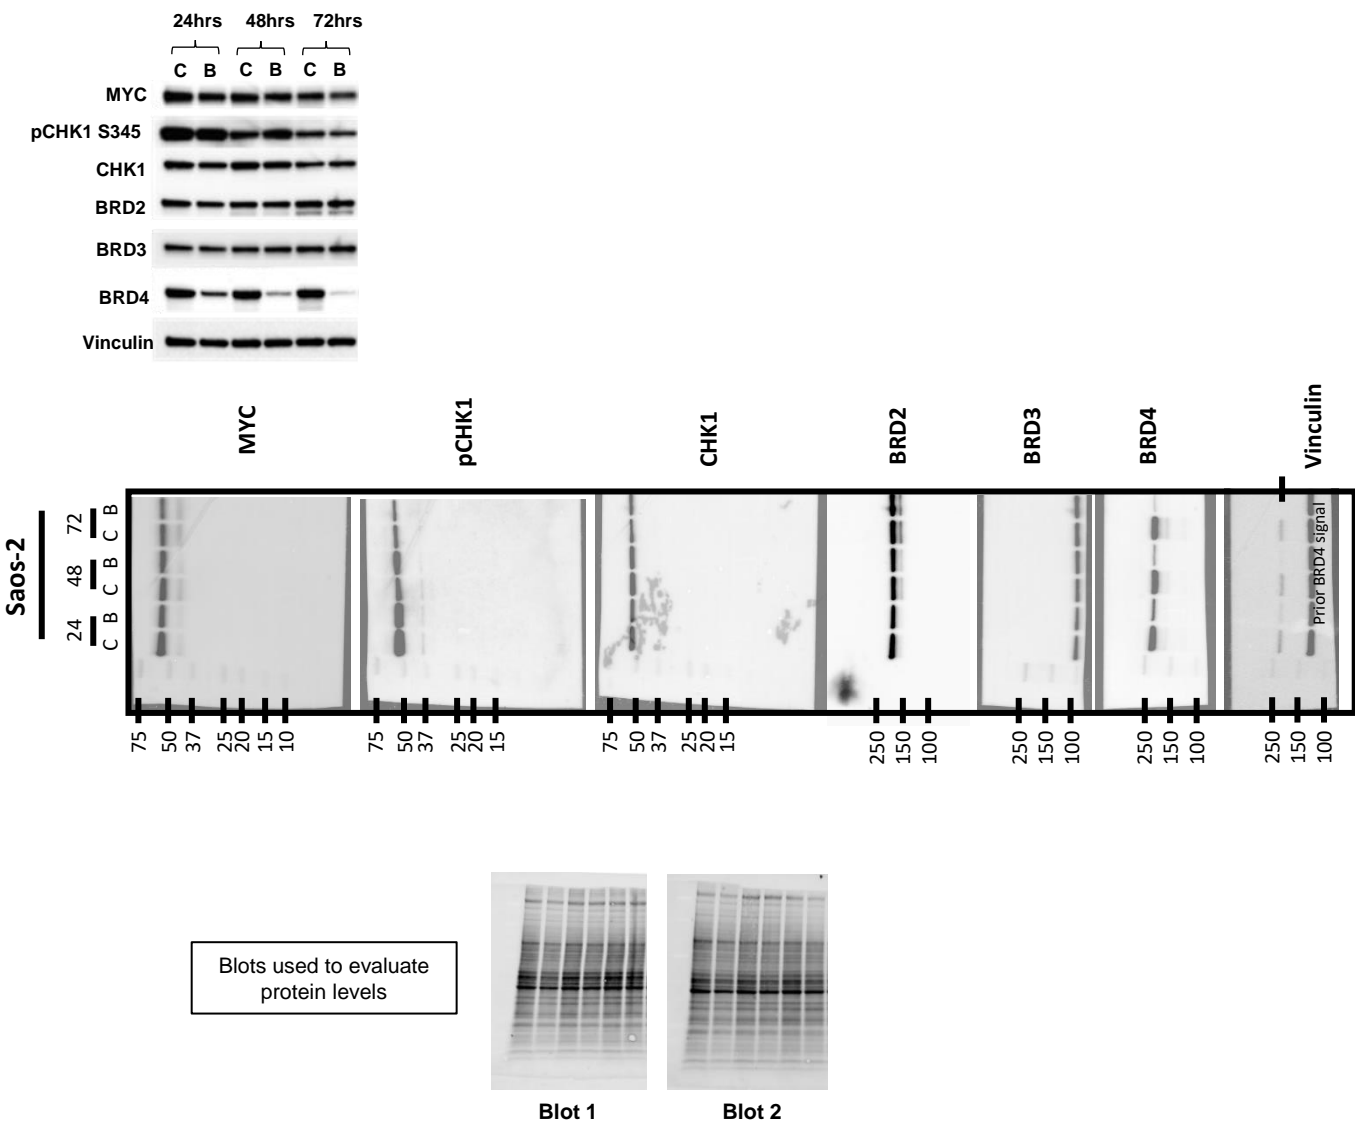

**Figure S7:** BRD4 siRNA treated Saos2 cells resulted in down-regulation of BRD4 but not MYC, CHK1, or other BET proteins. C= control siRNA; B= BRD4 siRNA. *Whole blot with bands and all molecular weights*
